# Supplementary material for: Early development of attention to threat-related facial expressions
Source: PubMed Central journal article supplement (PMC5955579; doi:10.1371/journal.pone.0197424), 2018-05-16
Supplement: pone.0197424.s002.pdf [file pone.0197424.s002.pdf]

## Variables in the “Early Development - Eye Tracking and Questionnaire Data” dataset

| Variable                        | Label                                                                                                                                     | Measurement Level |
|---------------------------------|-------------------------------------------------------------------------------------------------------------------------------------------|-------------------|
| id                              | Participant ID                                                                                                                            | Scale             |
| Trialnumber                     | Trial number                                                                                                                              | Scale             |
| CentralStimulus                 | Stimulus Condition (Non-Face, Happy, Fearful, Angry)                                                                                      | Nominal           |
| LateralStimSide                 | Location of the lateral stimulus (Left, Right)                                                                                            | Nominal           |
| FaceTime                        | Duration of the first part of the trial (Face) in milliseconds                                                                            | Scale             |
| LateralStimTime                 | Duration of the second part of the trial (Face + Lateral Stimulus) in ms                                                                  | Scale             |
| AnalysisPeriodLength            | Length of the analysis period                                                                                                             | Scale             |
| LastTimeInCenterAOI             | Last time gaze recorded in the central area                                                                                               | Scale             |
| FirstTimeInLateralAOI           | First time gaze recorded in the lateral area                                                                                              | Scale             |
| ValidGazeR                      | % Valid gaze, right eye                                                                                                                   | Scale             |
| ValidGazeL                      | % Valid gaze, left eye                                                                                                                    | Scale             |
| LongestNonValidStreakR          | Duration of the longest non-valid data streak (right eye)                                                                                 | Scale             |
| LongestNonValidStreakL          | Duration of the longest non-valid data streak (left eye)                                                                                  | Scale             |
| LongestNonValidStreakCombined   | Duration of the longest non-valid data streak (both eyes)                                                                                 | Scale             |
| InsideCentralAOIBeforeGazeShift | % of gaze inside central AOI before gaze shift to the lateral stimulus/end of the analysis period                                         | Scale             |
| AOIBorderViolationYesNo         | Gaze shift between AOIs during a period of non-valid data                                                                                 | Nominal           |
| SRT                             | Saccadic Reaction Time (-1, missing value)                                                                                                | Scale             |
| DwellIndex                      | Normalized dwell time index score (-1, missing value)                                                                                     | Scale             |
| AgeGroup                        | Age group in months (5, 7, 12, or 36)                                                                                                     | Nominal           |
| Model                           | Face model                                                                                                                                | Nominal           |
| OddTrial                        | 1 = Odd numbered trial, 0= even numbered trials                                                                                           | Nominal           |
| Sex                             | Sex of the infant                                                                                                                         | Nominal           |
| Race                            | Child's race                                                                                                                              | Nominal           |
| STAI_Trait_Mx20_Inf             | Composite trait anxiety from the Spielberger State and Trait Anxiety Inventory (STAI; Mean * 20 - handling missing values) (Infant visit) | Scale             |
| BDI_Mx21_Inf                    | Total depression score from the Beck Depression Inventory (BDI; Mean * 21 - handling missing values) (Infant visit)                       | Scale             |
| STAI_Trait_Mx20_3yr             | Composite trait anxiety from the Spielberger State and Trait Anxiety Inventory (STAI; Mean * 20 - handling missing values) (3yr visit)    | Scale             |

|                         |                                                                                                                  |         |
|-------------------------|------------------------------------------------------------------------------------------------------------------|---------|
| BDI_Mx21_3yr            | Total depression score from the Beck Depression Inventory (BDI; Mean * 21 - handling missing values) (3yr visit) | Scale   |
| P1_Education            | Parent 1 highest level of education                                                                              | Nominal |
| Family_Income           | Total combined family income over the past 12 months                                                             | Nominal |
| PrecedingExpCondition   | Experimental condition preceding the eye tracking test                                                           | Nominal |
| PrecedingStudyType      | Neuroimaging method used in the experiment preceding experimental condition                                      | Nominal |
| calib_qual_inf          | Quality of eye-tracking calibration (infant visit)                                                               | Scale   |
| calib_qual_3yf          | Quality of eye-tracking calibration (3-year visit)                                                               | Scale   |
| Respondent_Inf_STAI_BDI | Relationship of the person who filled out the questionnaires to the infant                                       | Nominal |
| Respondent_3yr_STAI_BDI | Relation of the person who filled out the 3yr questionnaires to the infant                                       | Nominal |
| AgeInfantVis            | Age in days (infant visit)                                                                                       | Scale   |
| Age3yVis                | Age in days (3y visit)                                                                                           | Scale   |

### Variable Values

| Value     | Label                                                                                                                                                                                                                                                          |
|-----------|----------------------------------------------------------------------------------------------------------------------------------------------------------------------------------------------------------------------------------------------------------------|
| OddTrial  | 1 = Odd numbered trial,<br>0= even numbered trials                                                                                                                                                                                                             |
| Sex       | 0 Male<br>1 Female                                                                                                                                                                                                                                             |
| Ethnicity | 0 Non Hispanic, Latino/a,<br>or Spanish origin<br>1 Mexican, Mexican<br>American, or Chicano/a<br>2 Puerto Rican<br>3 Cuban<br>4 Other Hispanic,<br>Latino/a, or Spanish<br>origin<br>5 Mixed Hispanic,<br>Latino/a, or Spanish<br>origin<br>9 Did not respond |
| Race      | 0 White<br>1 Black or African<br>American<br>2 American Indian or<br>Alaska Native<br>3 Asian Indian                                                                                                                                                           |

|                                 |    |                                                                                       |
|---------------------------------|----|---------------------------------------------------------------------------------------|
|                                 | 4  | Asian (Chinese, Japanese, Korean, Vietnamese, or Other)                               |
|                                 | 5  | Pacific Islander (Filipino, Native Hawaiian, Guamanian or Chomorro, Samoan, or Other) |
|                                 | 6  | Mixed Race                                                                            |
|                                 | 9  | Did not respond                                                                       |
| P1_Education                    | 1  | 8th Grade or Less                                                                     |
|                                 | 2  | Some High School                                                                      |
|                                 | 3  | High School/GED                                                                       |
|                                 | 4  | Associates Degree                                                                     |
|                                 | 5  | Bachelors Degree                                                                      |
|                                 | 6  | Masters Degree                                                                        |
|                                 | 7  | M.D., Ph.D., J.D. or Equivalent                                                       |
| Family_Income                   | 0  | Don't Know                                                                            |
|                                 | 1  | Less than \$5,000                                                                     |
|                                 | 2  | \$5,000 through \$11,999                                                              |
|                                 | 3  | \$12,000 through \$15,999                                                             |
|                                 | 4  | \$16,000 through \$24,999                                                             |
|                                 | 5  | \$25,000 through \$34,999                                                             |
|                                 | 6  | \$35,000 through \$49,999                                                             |
|                                 | 7  | \$50,000 through \$74,999                                                             |
|                                 | 8  | \$75,000 through \$99,999                                                             |
|                                 | 9  | \$100,000 and greater                                                                 |
| PrecedingExpCondition           | 1  | Human Faces                                                                           |
|                                 | 2  | Animal Faces                                                                          |
|                                 | 99 | N/A                                                                                   |
| PrecedingStudyType              | 1  | ERP                                                                                   |
|                                 | 2  | NIRS                                                                                  |
| Respondent_Inf_STAI_BDI_Cleaned | 1  | Mother                                                                                |
|                                 | 2  | Father                                                                                |
|                                 | 3  | Other - See Respond_Specify                                                           |
| Respondent_3yr_STAI_BDI_Cleaned | 1  | Mother                                                                                |
|                                 | 2  | Father                                                                                |
|                                 | 3  | Other                                                                                 |
